# Supplementary material for: Bioinspired and eco-friendly high efficacy cinnamaldehyde antibacterial surfaces
Source: Royal Society of Chemistry journal article supplement (doi:10.1039/d0tb02379e), 2021-01-01
Supplement: d0tb02379e1.pdf [file d0tb02379e1.pdf]

## **Bioinspired and Eco-Friendly High Efficacy Cinnamaldehyde Antibacterial Surfaces**

**(Supplementary Information)**

Harrison J. Cox<sup>a</sup>, Jing Li<sup>a</sup>, Preeti Saini<sup>a</sup>, Joy. R. Paterson<sup>b</sup>, Gary J. Sharples<sup>b</sup>, and  
Jas Pal S. Badyal<sup>a\*</sup>

<sup>a</sup> Department of Chemistry, Durham University, Durham DH1 3LE, England, UK

<sup>b</sup> Department of Biosciences, Durham University, Durham DH1 3LE, England, UK

\* Corresponding author email: [j.p.badyal@durham.ac.uk](mailto:j.p.badyal@durham.ac.uk)

## 1. FIGURES

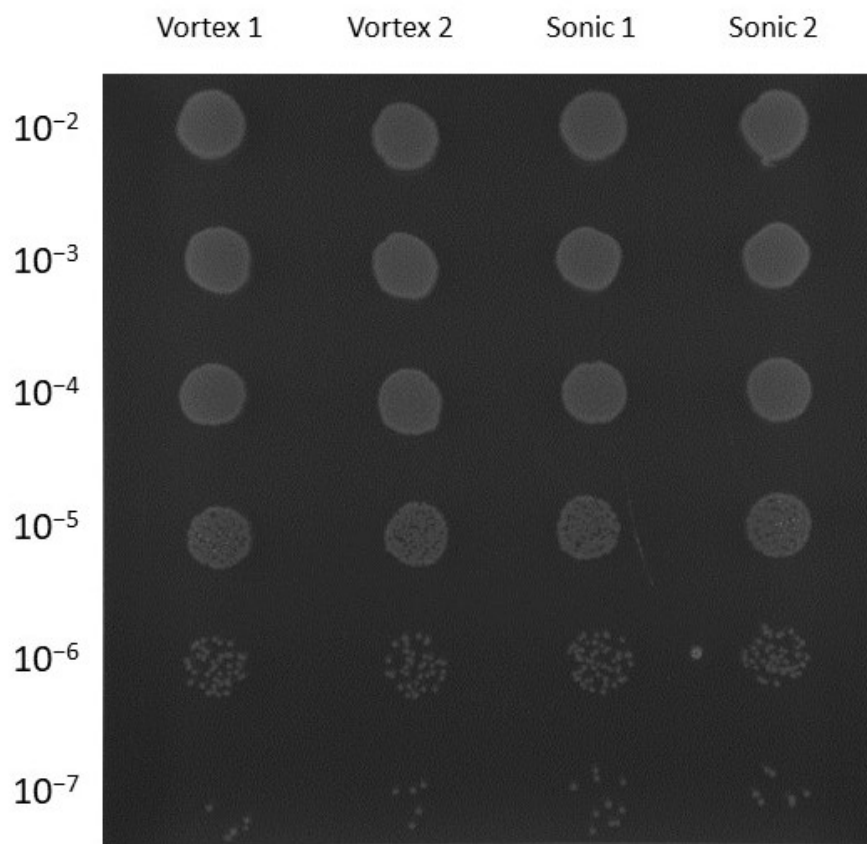

Figure S 1: Uncoated PET samples were used to create a 1:10 dilution series in Luria-Bertani broth from  $10^{-2}$  to  $10^{-7}$ . 10  $\mu$ l of each dilution containing *E. coli* was applied onto a Luria-Bertani agar plate which was incubated overnight at 30°C. Cell counts at  $10^{-6}$ : V1 = 32 (=  $3.2 \times 10^9$  ml $^{-1}$ ), V2 = 37 (=  $3.7 \times 10^9$  ml $^{-1}$ ), S1 = 40 (=  $4.0 \times 10^9$  ml $^{-1}$ ), and S2 = 35 (=  $3.5 \times 10^9$  ml $^{-1}$ ). Similar bacterial numbers were recovered from uncoated PET samples regardless of whether vortexing (V) or sonication (S) was used.

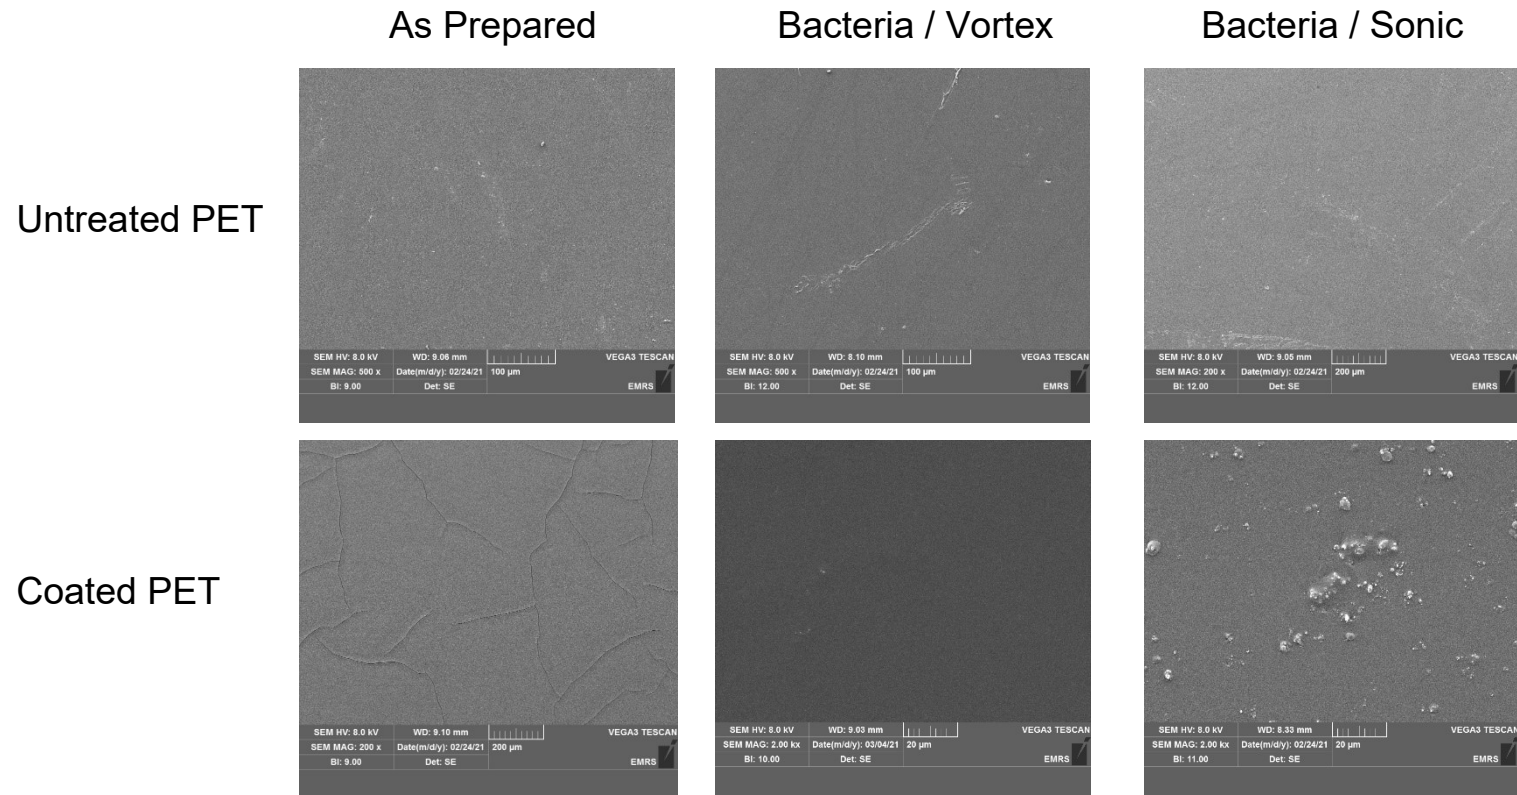

Figure S 2: Scanning electron microscopy (SEM) images of uncoated and polydopamine–cinnamaldehyde coated PET film surfaces: as prepared, after exposure of the *E. coli* culture and vortexing or sonication to remove any surface bound bacterial cells.

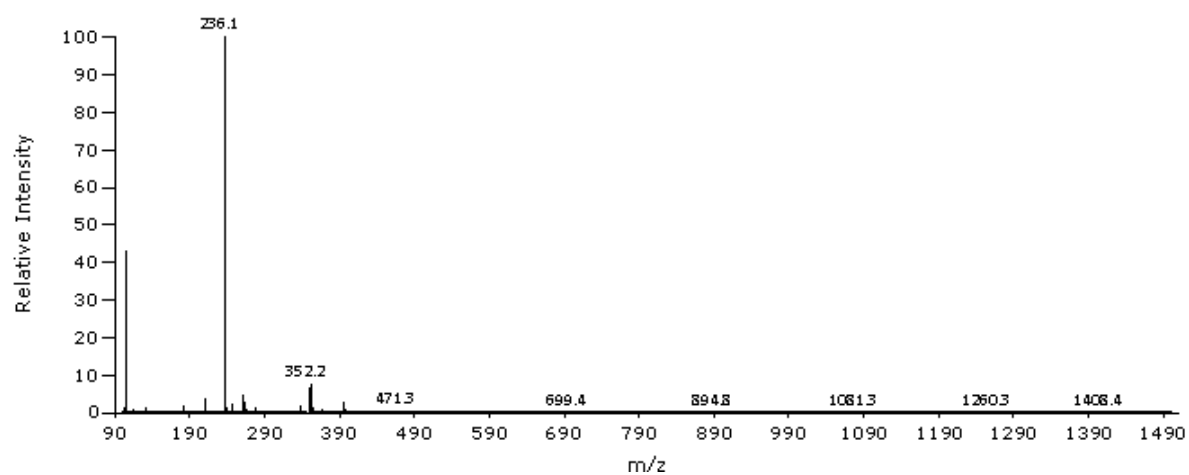

Figure S 3: Atmospheric pressure solids analysis probe ionisation (ASAP) mass spectrum of phenethylamine and cinnamaldehyde reaction product.

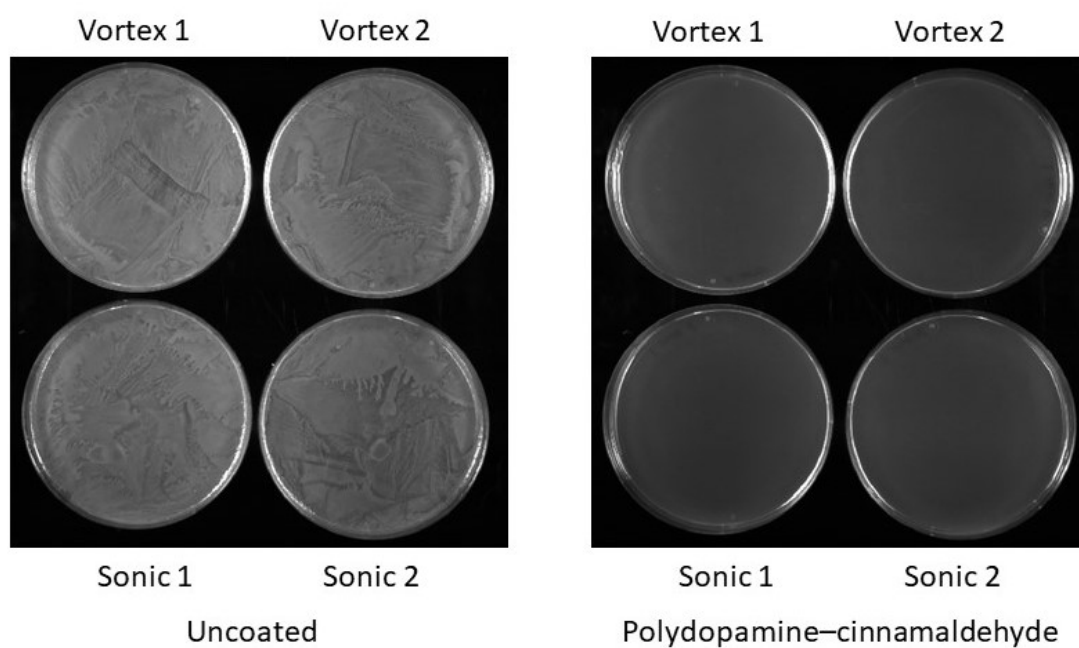

Figure S 4: After exposure of the *E. coli* solution to uncoated PET film or polydopamine-cinnamaldehyde coated PET film, 900  $\mu$ L of sterile Luria-Bertani broth was added into each microtube containing the sample followed by either vortexing or sonication, the polydopamine-cinnamaldehyde coated PET film was removed, and 100  $\mu$ L of each bacteria solution spread onto a Luria-Bertani agar plate, and incubated overnight at 30°C.

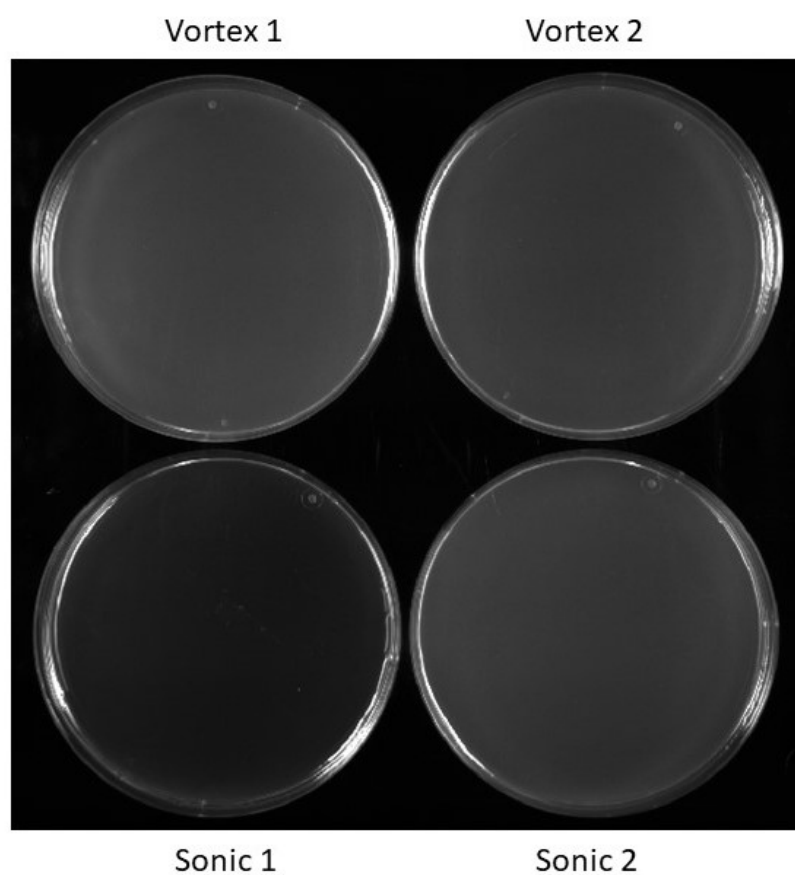

Figure S 5: After exposure of polydopamine–cinnamaldehyde coated PET film to *E. coli*, and then addition of 900  $\mu$ L of sterile Luria-Bertani broth into the microtube containing sample followed by either vortexing or sonication, the polydopamine–cinnamaldehyde coated PET film was removed, and 900  $\mu$ L of *E. coli* bacteria solution was centrifuged at 13,000 rpm for 2 min. The supernatant was discarded, and 100  $\mu$ L of PBS was added and vortexed to recover any cells present. This 100  $\mu$ L resuspension was then spread onto an Luria-Bertani agar plate, and incubated overnight at 30°C. No colonies were observed following incubation.
